# Supplementary material for: Cardiolipin-Containing Lipid Membranes Attract the Bacterial Cell Division Protein DivIVA
Source: MDPI journal article supplement (doi:10.3390/ijms22158350), 2021-08-03
Supplement: s1 [file s1]

## SUPPLEMENTARY INFORMATION

### **The cell division protein DivIVA binds preferentially to cardiolipin-containing lipid membranes**

Nad'a Labajová<sup>1#</sup>, Natalia Baranova<sup>2</sup>, Miroslav Jurásek<sup>3</sup>, Robert Vácha<sup>3#</sup>, Martin Loose<sup>2</sup>, and Imrich Barák<sup>1#</sup>

<sup>1</sup> Institute of Molecular Biology SAS, Dubravská cesta 21, 845 51 Bratislava, Slovakia

<sup>2</sup> Institute of Science and Technology Austria (IST Austria), Am Campus 1, 3400 Klosterneuburg, Austria

<sup>3</sup> CEITEC and Faculty of Science, Masaryk University, Kamenice 5, Brno, 625 00, Czech Republic

# For correspondence: umbinapa@savba.sk, imrich.barak@savba.sk or robertvacha@gmail.com

**Table S1 Strains and plasmids**

| Strain                                    | Description                                                                                                   | Reference  |
|-------------------------------------------|---------------------------------------------------------------------------------------------------------------|------------|
| <i>E. coli</i> MM294                      | <i>lnV44(AS) rfbC1 endA1 spoT1 thi-1 hsdR17 creC510</i>                                                       | [1]        |
| <i>E. coli</i> DH5 $\alpha$               | $\Delta lacZ \Delta M15 \Delta(lacZYA-argF)$ U169 <i>recA1 endA1 hsdR17(rK-mK+) supE44 thi-1 gyrA96 relA1</i> | [2]        |
| <i>E. coli</i> BL21(DE3)pLysS             | <i>ompT, hsdSB(rB-rB-), dcm, gal pLysS</i>                                                                    | [3]        |
| Plasmid                                   |                                                                                                               |            |
| pET-26b                                   |                                                                                                               | Novagen    |
| pTB146                                    | <i>bla lacI<sup>q</sup> P<sub>T7</sub>::h-sumo</i>                                                            | [4]        |
| pET26-divIVA <sub>Cd</sub>                | full length <i>divIVA<sub>Cd</sub></i> gene NdeI/BamHI inserted in pET-26b                                    | this study |
| pTB-divIVA <sub>Cd</sub>                  | full length <i>divIVA<sub>Cd</sub></i> gene SapI/BamHI inserted in pTB146                                     | this study |
| pET-26b- $\Delta$ 60-DivIVA <sub>Cd</sub> | first 160 nt lacking <i>divIVA<sub>Cd</sub></i> gene NdeI/BamHI inserted in pET-26b                           | this study |

**Table S2 Oligonucleotide list**

| Oligonucleotid name | Sequence (5'→3')                       |
|---------------------|----------------------------------------|
| divIVAcNdeIS        | CGTCGTCGTCATATGCTAACTCCAATTGAGATAG     |
| divIVAcSapIS        | CGTCGTGCTCTCCGGTATGCTAACTCCAATTGAGATAG |
| divIVAcBamHIE       | CGTCGTCGTGGATCCGCTTATTCTAAAGTTGTAGCAGC |
| divIVAc_del60_NdeIS | GATGATGATCATATGAATATTGAAGAAACACTAAAAG  |

### Table S3 Lipid mixtures

|      | PC     | PG    | CL    | PS | TF-CL | Rh-PE |
|------|--------|-------|-------|----|-------|-------|
| L1   | 70.0%  | 30.0% |       |    |       |       |
| L2   | 100.0% |       |       |    |       |       |
| L3   | 67.5%  | 30.0% | 2.5%  |    |       |       |
| L4   | 65.0%  | 30.0% | 5.0%  |    |       |       |
| L5   | 62.5%  | 30.0% | 7.5%  |    |       |       |
| L6   | 55.0%  | 30.0% | 15.0% |    |       |       |
| L1*  | 69.9%  | 30.0% |       |    | 0.1%  |       |
| L4*  | 64.9%  | 30.0% | 5.0%  |    | 0.1%  |       |
| L1** | 69.9%  | 30.0% |       |    |       | 0.1%  |
| L4** | 64.9%  | 30.0% | 5.0%  |    |       | 0.1%  |

PC, phosphatidylcholine;  
PG, phosphatidylglycerol;  
CL, cardiolipin;  
Rh-PE, lissamine rhodamine phosphatidylethanolamine;  
TF-CL, TopFluor cardiolipin

**Table S4 P-values from sedimentation assays with full length DivIVA<sub>Cd</sub>**

|           | <b>no lipids</b> | <b>L1</b> | <b>L2</b> | <b>L4</b> | <b>L6</b> |
|-----------|------------------|-----------|-----------|-----------|-----------|
| <b>L1</b> | 0.0017           | X         | 0.0211    | 0.0009    | <0.0001   |
| <b>L2</b> | 0.0759           | X         | X         | <0.0001   | <0.0001   |
| <b>L4</b> | <0.0001          | X         | X         | X         | <0.0001   |
| <b>L6</b> | <0.0001          | X         | X         | X         | X         |

**Table S5 P-values from sedimentation assays with truncated  $\Delta 60$ -DivIVA<sub>Cd</sub>**

|           | <b>no lipids</b> | <b>L1</b> | <b>L2</b> | <b>L4</b> | <b>L6</b> |
|-----------|------------------|-----------|-----------|-----------|-----------|
| <b>L1</b> | 0.0777           | X         | 0.0228    | 0.2373    | 0.3302    |
| <b>L2</b> | 0.3355           | X         | X         | 0.1416    | 0.2035    |
| <b>L4</b> | 0.4835           | X         | X         | X         | 0.9432    |
| <b>L6</b> | 0.5150           | X         | X         | X         | X         |

**Table S6 Summary of values obtained in sedimentation assays**

|                | <b>DivIVA<sub>Cd</sub></b>                        |                |                  |
|----------------|---------------------------------------------------|----------------|------------------|
|                | <b>SOL (%)</b>                                    | <b>PEL (%)</b> | <b>STDEV (%)</b> |
| <b>no SUVs</b> | 95.4                                              | 4.6            | 5.3              |
| <b>L1</b>      | 89.9                                              | 10.1           | 4.9              |
| <b>L2</b>      | 94.7                                              | 5.3            | 2.8              |
| <b>L4</b>      | 80.9                                              | 19.1           | 4.6              |
| <b>L6</b>      | 51.5                                              | 48.5           | 7.1              |
|                | <b><math>\Delta 60</math>-DivIVA<sub>Cd</sub></b> |                |                  |
|                | <b>SOL (%)</b>                                    | <b>PEL (%)</b> | <b>STDEV (%)</b> |
| <b>no SUVs</b> | 92.9                                              | 7.1            | 4.6              |
| <b>L1</b>      | 90.0                                              | 10.0           | 3.4              |
| <b>L2</b>      | 93.5                                              | 6.5            | 5.6              |
| <b>L4</b>      | 92.4                                              | 7.6            | 4.1              |
| <b>L6</b>      | 90.4                                              | 9.6            | 4.6              |

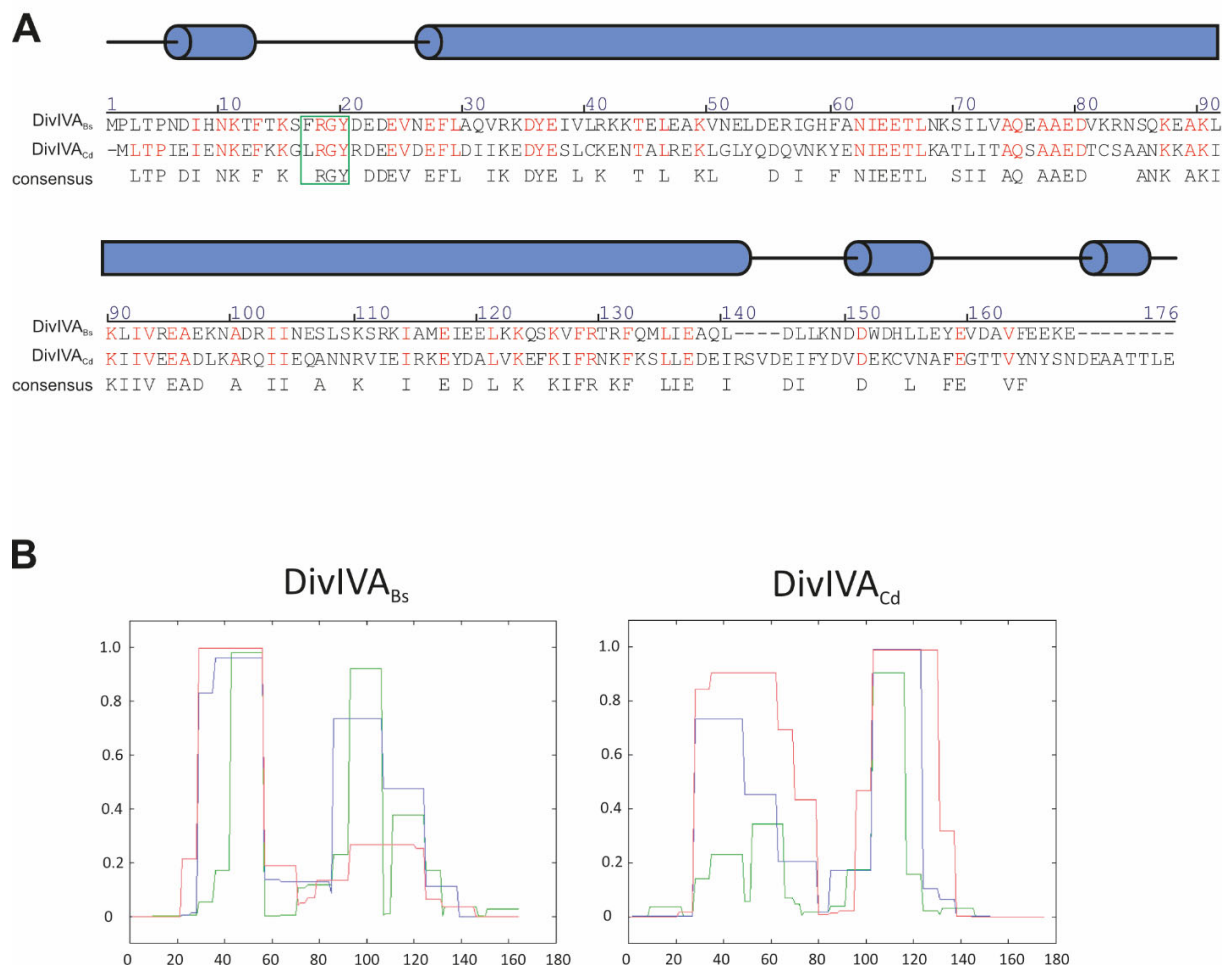

**Fig. S1 Comparison of DivIVA<sub>Bs</sub> and DivIVA<sub>Cd</sub> primary structures and secondary structure and coiled-coils predictions**

A. Secondary structure prediction and alignment of DivIVA<sub>Cd</sub> and DivIVA<sub>Bs</sub>. DivIVA<sub>Cd</sub> and DivIVA<sub>Bs</sub> share 46.6% similarity and 31.1% identity. The residues, which are important for DivIVA<sub>Bs</sub> binding to the membrane and corresponding residues in DivIVA<sub>Cd</sub> are in green rectangle, identical residues are in red font.

B. Coiled-coil predictions. Green line corresponds to window of 14, blue line to window of 21, and red line to window of 28 residues. Predicted in COILS version 2.2 [5,6].



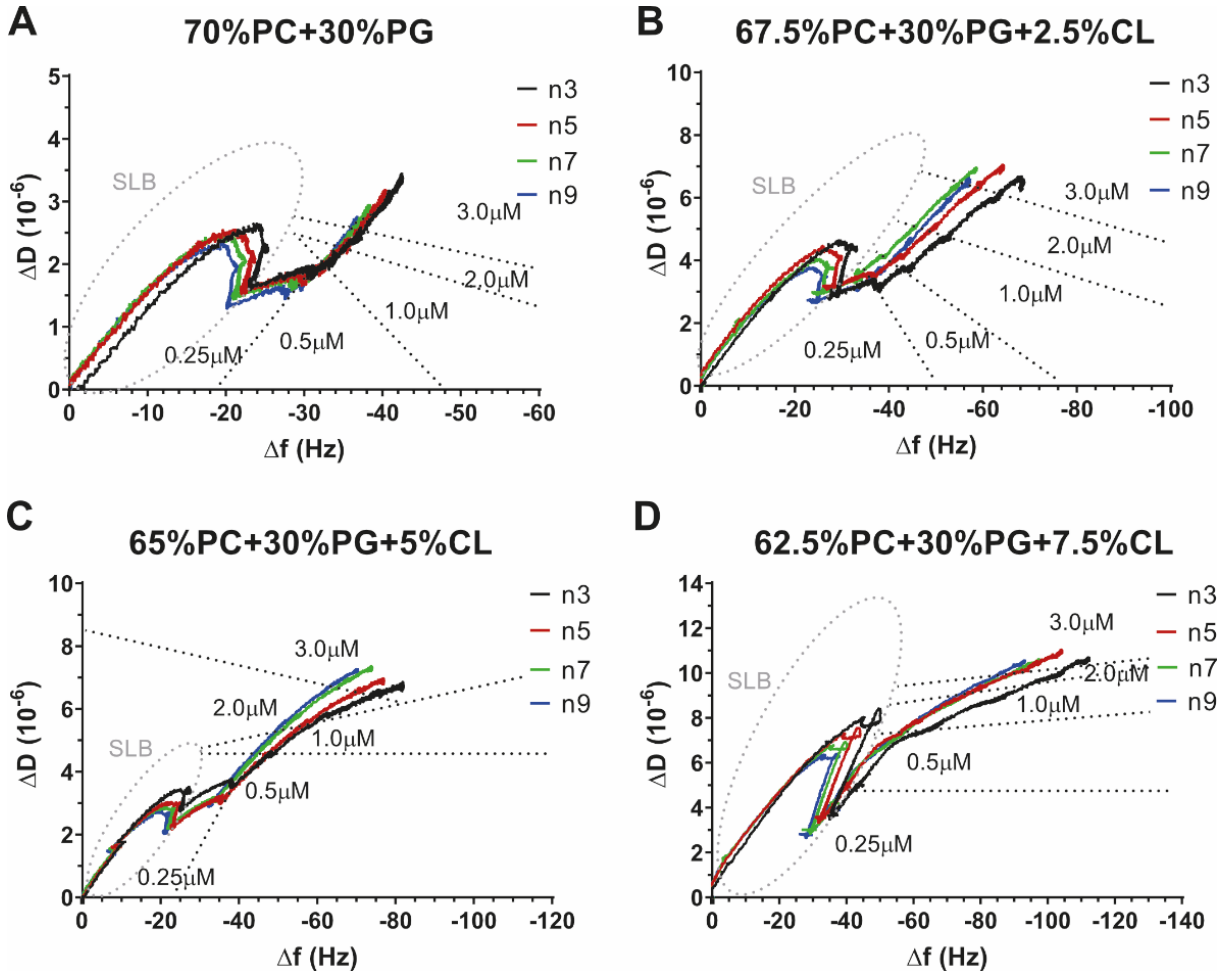

**Fig. S2 Dynamic analysis of DivIVA<sub>Cd</sub> lipid binding to SLB**

A-D. Plots of  $\Delta f$  against  $\Delta D$  indicate that DivIVA<sub>Cd</sub> binding changes the morphology of the lipid bilayer. Representative measurements of the third (in black), fifth (in red), seventh (in green) and ninth (in blue) overtones as offset to zero after obtaining the baseline prior SLB formation are shown. The SLB formation is depicted in grey dashed oval, the plot is divided to areas corresponding to particular concentrations of DivIVA<sub>Cd</sub> by black dashed lines. The x-axis is reversed thus ascending curve indicates increased mass absorption. In the presence of cardiolipin and DivIVA<sub>Cd</sub> the curves are not overlapping, which means soft biofilm is formed.

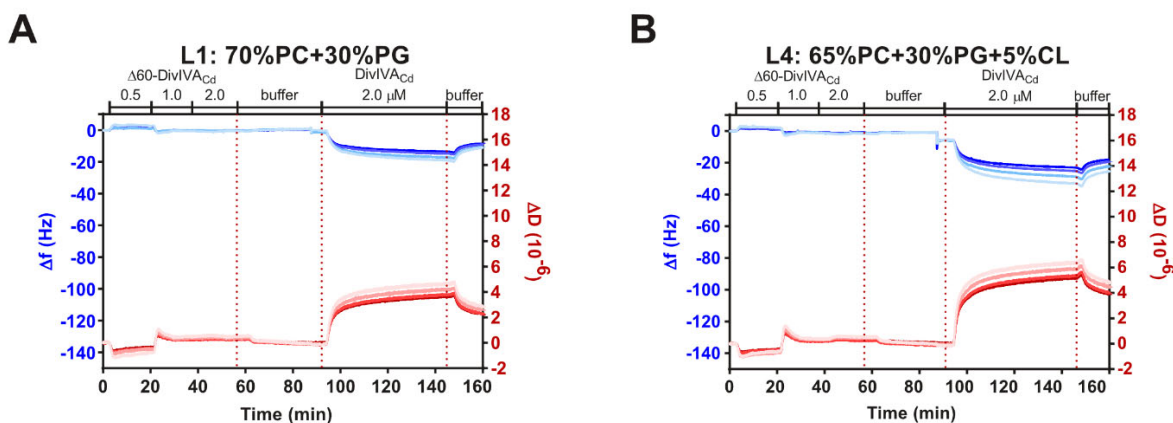

**Fig. S3 QCM-D with N-terminally truncated DivIVAC<sub>d</sub>**

The plots show details of  $\Delta f$  (in blue) and  $\Delta D$  (in red) of the third, fifth, seventh and ninth overtone (lower overtones are in lighter tone, highest overtone is darkest), which were normalized to baseline obtained after SLB formation. As indicated above the plots, QCM-D measurements obtained after addition of 0.5  $\mu\text{M}$   $\Delta 60\text{-DivIVAC}_d$ , 1.0  $\mu\text{M}$   $\Delta 60\text{-DivIVAC}_d$ , and 2.0  $\mu\text{M}$   $\Delta 60\text{-DivIVAC}_d$  to SLBs mixtures (A) L1 (70% PC and 30% PG) and (B) L4 (65% PC, 30% PG and 5% CL) are shown. As a positive control, in both experiments, after an extensive buffer wash (marked by the first two red dashed lines), we injected 2  $\mu\text{M}$  full-length DivIVAC<sub>d</sub> and we observed similar  $\Delta f$  response as in previous experiments with 2  $\mu\text{M}$  DivIVAC<sub>d</sub> and L1 or L4 lipid mixture. The third dashed red line marks the final buffer rinse. While full-length DivIVAC<sub>d</sub> produced a response similar to that seen previously under the same conditions, the  $\Delta 60\text{-DivIVAC}_d$  protein did not bind to either of the tested SLBs.

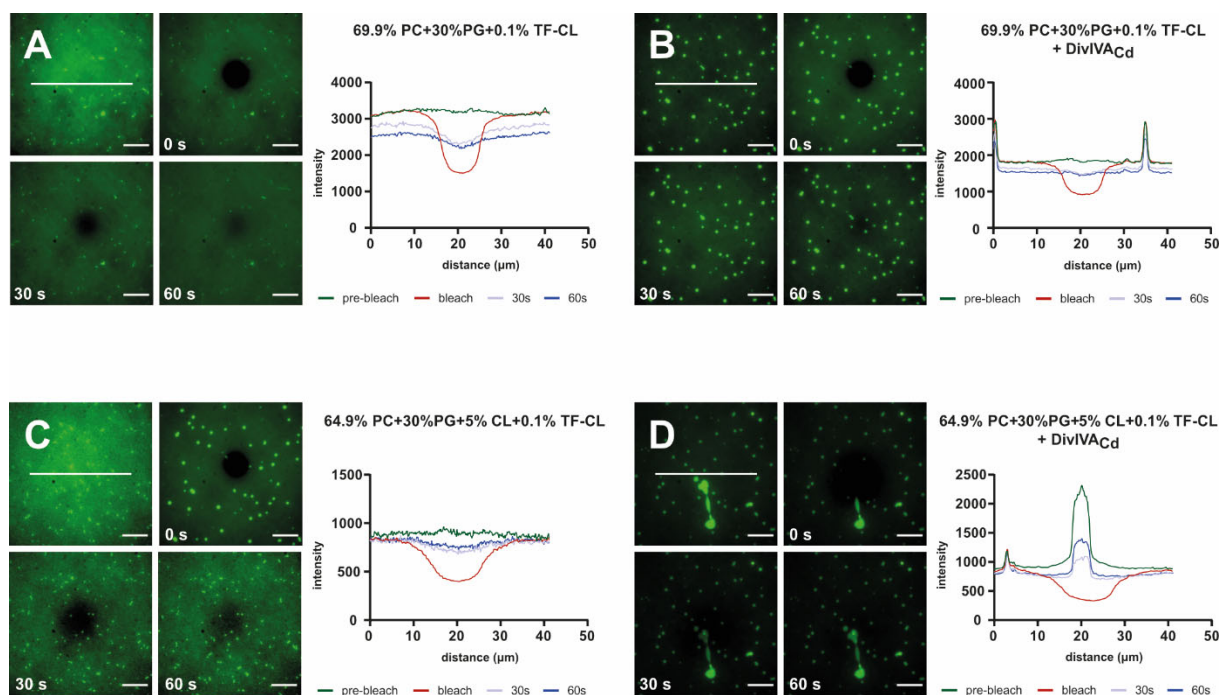

**Fig. S4 FRAP revealed that lipid mobility is preserved in SLBs**

SLBs composed of (A, B) 69.9% PC, 30% PG and 0.1% TF-CL (L1\*) and (C, D) 64.9% PC, 30% PG+5% CL and 0.1% TF-CL (L4\*) were subjected to FRAP analysis both before and after the addition of 2 μM DivIVA<sub>Cd</sub>. Representative images are shown with 10 μm scale bars. The plots represent fluorescence intensities before bleaching (green line), bleaching (red line), and 30 s and 60 s after bleaching (blue lines) measured along the white line shown in the upper left panel. The recovery within bleached areas indicate that the lipids remained dynamic within the SLBs even after DivIVA<sub>Cd</sub> addition and cluster formation.

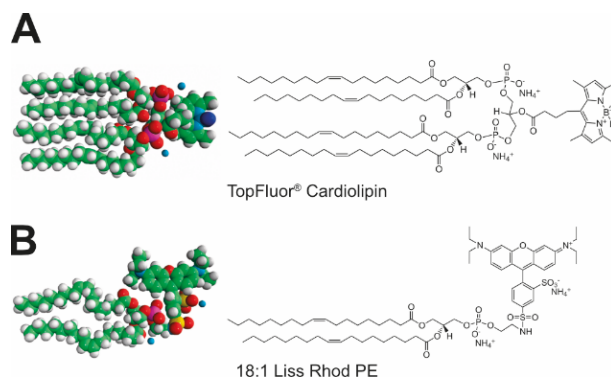

**Fig. S5 Structures of fluorescent derivatives of CL and PE used in the study**

(A) TopFluor® Cardiolipin: 1,1',2,2'-tetraoleoyl cardiolipin[4-(dipyrrrometheneboron difluoride)butanoyl];

(B) 18:1 Liss Rhod PE: 1,2-dioleoyl-sn-glycero-3-phosphoethanolamine-N-(lissamine rhodamine B sulfonyl). Source: avantilipids.com

## REFERENCES

1. Bachmann, B.J. Pedigrees of some mutant strains of *Escherichia coli* K-12. *Bacteriological Reviews* **1972**, *36*, 525–557, doi:10.1128/br.36.4.525-557.1972.
2. Taylor, R.G.; Walker, D.C.; McInnes, R.R. *E.coli* host strains significantly affect the quality of small scale plasmid DNA preparations used for sequencing. *Nucleic Acids Research* **1993**, *21*, 1677–1678, doi:https://doi.org/10.1093/nar/21.7.1677.
3. Studier, F.W.; Moffatt, B.A. Use of bacteriophage T7 RNA polymerase to direct selective high-level expression of cloned genes. *Journal of Molecular Biology* **1986**, *189*, 113–130, doi:10.1016/0022-2836(86)90385-2.
4. Bendezú, F.O.; De Boer, P.A.J. Conditional lethality, division defects, membrane involution, and endocytosis in *mre* and *mrd* shape mutants of *Escherichia coli*. *Journal of Bacteriology* **2008**, *190*, 1792–1811, doi:10.1128/JB.01322-07.
5. Combet, C.; Blanchet, C.; Geourjon, C.; Deléage, G. NPS@: Network protein sequence analysis. *Trends in Biochemical Sciences* **2000**, *25*, 147–150, doi:10.1016/s0968-0004(99)01540-6.
6. Lupas, A.; Van Dyke, M.; Stock, J. Predicting coiled coils from protein sequences. *Science* **1991**, *252*, 1162–1164, doi:10.1126/science.252.5009.1162.
